# Supplementary material
Source: PubMed Central journal article supplement (PMC2734203)
Supplement: 080947v2_4.pdf [file 080947v2_4.pdf]

## Asthma education sessions content

| Session | Title                         | Content                                                                                                                                                                                                                                                                                                                                                                                                                                                                                                                              |
|---------|-------------------------------|--------------------------------------------------------------------------------------------------------------------------------------------------------------------------------------------------------------------------------------------------------------------------------------------------------------------------------------------------------------------------------------------------------------------------------------------------------------------------------------------------------------------------------------|
| 1       | What is asthma?               | <p>basic epidemiology and pathophysiology</p> <ul style="list-style-type: none"> <li>• chronic disease</li> <li>• “sensitive” airways</li> <li>• inflammation vs. bronchospasm</li> <li>• causes of asthma vs. myths</li> </ul> <p>goals of management</p> <ul style="list-style-type: none"> <li>• introduction to steps in achieving control</li> </ul> <p>warning signs of an acute episode of asthma</p> <ul style="list-style-type: none"> <li>• common symptoms</li> <li>• early warning signs</li> </ul>                      |
| 2       | Asthma triggers and avoidance | <p>common asthma triggers</p> <ul style="list-style-type: none"> <li>• trigger definition</li> <li>• how to identify triggers</li> <li>• common triggers (smoke, allergens, viral infections, irritants, exercise, emotions, weather, medicines)</li> </ul> <p>avoidance and control strategies</p> <ul style="list-style-type: none"> <li>• trigger actions (identify, avoid, control)</li> <li>• consideration of different environments (home, school, friends)</li> </ul> <p>using an asthma diary</p>                           |
| 3       | Asthma medications            | <p>types of medications, correct use of medications</p> <ul style="list-style-type: none"> <li>• goals of medications</li> <li>• how do different medications work (what they do, how fast they do it)</li> <li>• side effects</li> </ul> <p>demonstration and evaluation of inhaled delivery device technique</p> <p>use of an asthma action plan</p> <ul style="list-style-type: none"> <li>• what is an action plan (sample plans and how to use)</li> <li>• how to work with your physician to develop and use a plan</li> </ul> |
| 4       | Asthma self-management        | <p>definition of self-management</p> <p>review of steps to achieve asthma control</p> <p>use of peak flow meters</p> <p>importance of partnering with your doctor</p> <p>ways to keep learning about asthma</p> <p>asthma scenarios with problem solving</p> <p>final questions</p>                                                                                                                                                                                                                                                  |
